# Supplementary material
Source: PubMed Central journal article supplement (PMC3462592)
Supplement: NIHMS399544-supplement-1_si_001.pdf [file NIHMS399544-supplement-1_si_001.pdf]

**Supporting Information**

**Design, Synthesis, and Preclinical Evaluations of Novel**

**4-Substituted 1,5-Diarylanilines as Potent HIV-1**

**Non-Nucleoside Reverse Transcriptase Inhibitor (NNRTI)**

**Drug Candidates**

Lian-Qi Sun,<sup>†</sup> Lei Zhu,<sup>‡</sup> Keduo Qian,<sup>||</sup> Bingjie Qin,<sup>†</sup> Li Huang,<sup>‡</sup>

Chin Ho Chen,<sup>‡</sup> Kuo-Hsiung Lee<sup>||,⊥</sup> and Lan Xie<sup>†\*</sup>

<sup>†</sup>*Beijing Institute of Pharmacology & Toxicology, 27 Tai-Ping Road, Beijing, 100850,*

*China*

<sup>‡</sup>*Duke University Medical Center, Box 2926, Surgical Oncology Research Facility,*

*Durham, NC 27710, USA*

<sup>||</sup>*Natural Products Research Laboratories, UNC Eshelman School of Pharmacy,*

*University of North Carolina, Chapel Hill, NC 27599-7568, USA*

<sup>⊥</sup>*Chinese Medicine Research and Development Center, China Medical University*

*and Hospital, Taichung, Taiwan*

**Contents**

1. HPLC Conditions
2. Tables for HPLC data of final compounds

**HPLC conditions:**

HPLC analyses for purity were performed using an Agilent TC-C18 column (4.6 × 250 mm, 5 μm) eluting with a mixture of solvents A and B (Condition 1: acetonitrile/water 70:30, flow rate 1.0 mL/min; Condition 2: methanol/water 70:30, flow rate 0.8 mL/min), detected under UV wavelength at 254 nm and an injection volume of 15 μL.

**Table 1.** Summary of HPLC purity data for target compounds

| compounds  | condition-1          |          | condition-2          |          |
|------------|----------------------|----------|----------------------|----------|
|            | Retention time (min) | Purity % | Retention time (min) | Purity % |
| <b>13a</b> | 8.346                | 100.00   | 21.905               | 97.91    |
| <b>13b</b> | 8.269                | 97.56    | 19.611               | 96.89    |
| <b>13c</b> | 8.445                | 99.32    | 18.683               | 100.00   |
| <b>13d</b> | 5.728                | 96.80    | 8.632                | 96.19    |
| <b>13e</b> | 2.801                | 100.00   | 4.524                | 96.42    |
| <b>14a</b> | 9.274                | 97.29    | 21.790               | 97.29    |
| <b>14b</b> | 3.656                | 100.00   | 5.213                | 100.00   |
| <b>14c</b> | 5.571                | 100.00   | 9.175                | 96.63    |
| <b>14d</b> | 3.786                | 100.00   | 4.353                | 97.03    |
| <b>14e</b> | 3.218                | 100.00   | 5.540                | 100.00   |
| <b>14f</b> | 4.322                | 100.00   | 7.233                | 100.00   |
| <b>14h</b> | 4.174                | 99.86    | 6.733                | 99.89    |
| <b>15a</b> | 7.329                | 95.47    | 13.276               | 95.80    |
| <b>15b</b> | 3.939                | 97.59    | 4.971                | 100.00   |
| <b>15c</b> | 4.954                | 100.00   | 7.155                | 100.00   |
| <b>15d</b> | 3.666                | 97.94    | 3.852                | 100.00   |
| <b>15e</b> | 3.785                | 100.00   | 5.338                | 100.00   |
| <b>15f</b> | 3.433                | 100.00   | 5.985                | 100.00   |
| <b>15h</b> | 4.082                | 96.24    | 5.903                | 99.14    |
| <b>15i</b> | 4.447                | 100.00   | 5.818                | 100.00   |
| <b>16a</b> | 4.388                | 100.00   | 6.741                | 100.00   |
| <b>16b</b> | 4.350                | 100.00   | 6.429                | 100.00   |
